# Supplementary material for: Structure of the human KMN complex and implications for regulation of its assembly
Source: PubMed Central journal article supplement (PMC11189300; doi:10.1038/s41594-024-01230-9), 2024-03-08
Supplement: 41594_2024_1230_MOESM2_ESM.pdf [file 41594_2024_1230_MOESM2_ESM.pdf]

## Reporting Summary

Nature Portfolio wishes to improve the reproducibility of the work that we publish. This form provides structure for consistency and transparency in reporting. For further information on Nature Portfolio policies, see our [Editorial Policies](#) and the [Editorial Policy Checklist](#).

### Statistics

For all statistical analyses, confirm that the following items are present in the figure legend, table legend, main text, or Methods section.

n/a Confirmed

- The exact sample size ( $n$ ) for each experimental group/condition, given as a discrete number and unit of measurement
- A statement on whether measurements were taken from distinct samples or whether the same sample was measured repeatedly
- The statistical test(s) used AND whether they are one- or two-sided  
*Only common tests should be described solely by name; describe more complex techniques in the Methods section.*
- A description of all covariates tested
- A description of any assumptions or corrections, such as tests of normality and adjustment for multiple comparisons
- A full description of the statistical parameters including central tendency (e.g. means) or other basic estimates (e.g. regression coefficient) AND variation (e.g. standard deviation) or associated estimates of uncertainty (e.g. confidence intervals)
- For null hypothesis testing, the test statistic (e.g.  $F$ ,  $t$ ,  $r$ ) with confidence intervals, effect sizes, degrees of freedom and  $P$  value noted  
*Give  $P$  values as exact values whenever suitable.*
- For Bayesian analysis, information on the choice of priors and Markov chain Monte Carlo settings
- For hierarchical and complex designs, identification of the appropriate level for tests and full reporting of outcomes
- Estimates of effect sizes (e.g. Cohen's  $d$ , Pearson's  $r$ ), indicating how they were calculated

*Our web collection on [statistics for biologists](#) contains articles on many of the points above.*

### Software and code

Policy information about [availability of computer code](#)

#### Data collection

EPU v2.7 Thermo Fisher Scientific  
Image Lab Bio-rad <https://www.bio-rad.com/de-de/product/image-lab-software?ID=KRE6P5E8Z>  
Slidebook, 3i (Intelligent Imaging Innovations)  
FortéBio Octet BLI Data acquisition software  
Deltavision SoftWoRx software

#### Data analysis

cryoSPARC Version 4.2.1 (Punjani et al. 2017, <https://cryosparc.com/>)  
TranSHIRE v1.4 (Stabrin et al., 2020 <https://transphire.readthedocs.io/en/latest/>)  
MOTIONCOR2 v1.3.0 Zheng et al., 2017 <http://msg.ucsf.edu/em/software/motioncor2.html>  
CTFFIND4 (Rohou and Grigorieff, 2015 <http://grigoriefflab.janelia.org/ctffind4>)  
MOTIONCOR2 (Zheng et al., 2017 <http://msg.ucsf.edu/em/software/motioncor2.html>)  
SPHIRE v1.5 (Moriya et al., 2017 <http://sphire.mpg.de>)  
cryOLO v1.7 (Wagner et al., 2019 <https://cryolo.readthedocs.io/en/stable/>)  
RELION v3.1.2 (Scheres Lab [https://www3.mrc-lmb.cam.ac.uk/relion/index.php?title=Main\\_Page](https://www3.mrc-lmb.cam.ac.uk/relion/index.php?title=Main_Page))  
Pymol v2.5.4 Schrödinger, LLC <https://pymol.org/2/>  
COOT v0.9.8.2 (Emsley et al., 2010 <https://www2.mrc-lmb.cam.ac.uk/personal/pemsley/coot/>)  
PHENIX v1.20.1 (Adams et al., 2010 <https://www.phenix-online.org>)  
DeepEMhancer v0.14 (Sanchez-Garcia et al., 2021 <https://github.com/rsanchezgarc/deepEMhancer>)  
AlphaFold-Multimer v3.2.1 Evans et al., 2021  
DynDom6D (Veevers and Hayward, 2019 <http://dyndom.cmp.uea.ac.uk/dyndom/dyndomDownload.jsp>)  
GraphPad Prism Version 9.0.2 (134) (GraphPad Software Inc <http://www.graphpad.com>)

Fiji Version 2.0.0-rc-69/1.52n (Schindelin et al., 2012 <http://imagej.nih.gov/ij/>)  
 CRaQ (Bodor et al., 2012 NA)  
 Image Lab (Bio-rad, <https://www.bio-rad.com/de-de/product/image-lab-software?ID=KRE6P5E8Z>)  
 Microcal PEAQ-ITC analysis software  
 FortéBio Octet BLI Data Analysis software

For manuscripts utilizing custom algorithms or software that are central to the research but not yet described in published literature, software must be made available to editors and reviewers. We strongly encourage code deposition in a community repository (e.g. GitHub). See the Nature Portfolio [guidelines for submitting code & software](#) for further information.

## Data

Policy information about [availability of data](#)

All manuscripts must include a [data availability statement](#). This statement should provide the following information, where applicable:

- Accession codes, unique identifiers, or web links for publicly available datasets
- A description of any restrictions on data availability
- For clinical datasets or third party data, please ensure that the statement adheres to our [policy](#)

The cryo-EM map and atomic coordinates have been deposited in the EMDDB under accession code EMD-18179 and the PDB under accession code 8Q5H, respectively. Validation report and processed files were provided with the manuscript for peer review.

## Research involving human participants, their data, or biological material

Policy information about studies with [human participants or human data](#). See also policy information about [sex, gender \(identity/presentation\), and sexual orientation](#) and [race, ethnicity and racism](#).

|                                                                    |                                             |
|--------------------------------------------------------------------|---------------------------------------------|
| Reporting on sex and gender                                        | <input type="text" value="Not applicable"/> |
| Reporting on race, ethnicity, or other socially relevant groupings | <input type="text" value="Not applicable"/> |
| Population characteristics                                         | <input type="text" value="Not applicable"/> |
| Recruitment                                                        | <input type="text" value="Not applicable"/> |
| Ethics oversight                                                   | <input type="text" value="Not applicable"/> |

Note that full information on the approval of the study protocol must also be provided in the manuscript.

## Field-specific reporting

Please select the one below that is the best fit for your research. If you are not sure, read the appropriate sections before making your selection.

Life sciences       Behavioural & social sciences       Ecological, evolutionary & environmental sciences

For a reference copy of the document with all sections, see [nature.com/documents/nr-reporting-summary-flat.pdf](https://nature.com/documents/nr-reporting-summary-flat.pdf)

## Life sciences study design

All studies must disclose on these points even when the disclosure is negative.

|                 |                                                                                                                                                                                                                                                                                                                                                                                                                           |
|-----------------|---------------------------------------------------------------------------------------------------------------------------------------------------------------------------------------------------------------------------------------------------------------------------------------------------------------------------------------------------------------------------------------------------------------------------|
| Sample size     | <input type="text" value="The relevant figure legends report the number of kinetochores for each condition in which fluorescence values were collected. We did not predetermine sample size, nor we calculated sample size. The choice of sample size was based on previous examples in the field, and are consistent with extensive previous experimentation determining epistatic relationships within kinetochores."/> |
| Data exclusions | <input type="text" value="No data were excluded from the analysis"/>                                                                                                                                                                                                                                                                                                                                                      |
| Replication     | <input type="text" value="We indicate the number of technical replicates of each experiment in the relevant figure legends"/>                                                                                                                                                                                                                                                                                             |
| Randomization   | <input type="text" value="For each immuno-fluorescence analysis, cells (in the indicated number) were chosen randomly for each quantification."/>                                                                                                                                                                                                                                                                         |
| Blinding        | <input type="text" value="The investigators were not blinded during data collection. The same investigators carried out the data collection and data analysis processes."/>                                                                                                                                                                                                                                               |

## Reporting for specific materials, systems and methods

## Materials & experimental systems

| n/a                                 | Involved in the study                                     |
|-------------------------------------|-----------------------------------------------------------|
| <input type="checkbox"/>            | <input checked="" type="checkbox"/> Antibodies            |
| <input type="checkbox"/>            | <input checked="" type="checkbox"/> Eukaryotic cell lines |
| <input checked="" type="checkbox"/> | <input type="checkbox"/> Palaeontology and archaeology    |
| <input checked="" type="checkbox"/> | <input type="checkbox"/> Animals and other organisms      |
| <input checked="" type="checkbox"/> | <input type="checkbox"/> Clinical data                    |
| <input checked="" type="checkbox"/> | <input type="checkbox"/> Dual use research of concern     |
| <input checked="" type="checkbox"/> | <input type="checkbox"/> Plants                           |

## Methods

| n/a                                 | Involved in the study                           |
|-------------------------------------|-------------------------------------------------|
| <input checked="" type="checkbox"/> | <input type="checkbox"/> ChIP-seq               |
| <input checked="" type="checkbox"/> | <input type="checkbox"/> Flow cytometry         |
| <input checked="" type="checkbox"/> | <input type="checkbox"/> MRI-based neuroimaging |

## Antibodies

### Antibodies used

anti-HsNSL1 [mouse monoclonal, clone QL24-1, generated in-house, 1:800]  
 anti-HsCENP-C (guinea pig polyclonal, MBL-PD030, MBL, 1:1000)  
 anti-HsNDC80 (mouse monoclonal, clone 93G, ab3613, Abcam, 1:3000)  
 anti-CENP-T (rabbit polyclonal, SI0822, generated in-house, 1:1000)  
 anti-HsKNL1 (rabbit polyclonal, SI0788, generated in-house 1:500)  
 anti-GFP (rabbit polyclonal, generated in house, 1:1000)  
 anti-Vinculin (mouse monoclonal, clone hVIN-1, V9131, Sigma-Aldrich, 1:10,000)  
 anti-guinea pig secondary (goat polyclonal, Alexa Fluor 488-conjugated, Invitrogen A21450, 1:200)  
 anti-mouse secondary (goat polyclonal, Alexa Fluor 488-conjugated, Invitrogen A11001, 1:200)  
 anti-mouse secondary (goat polyclonal, Rhodamine Red-conjugated, Jackson Immuno Research 115-295003, 1:200)  
 anti-rabbit secondary (donkey polyclonal, Alexa Fluor 488-conjugated, Invitrogen A21206, 1:200)  
 anti-rabbit secondary (donkey polyclonal, Rhodamine Red-conjugated, Jackson Immuno Research 711-295-152, 1:200)  
 anti-human secondary (goat polyclonal, Alexa Fluor 647-conjugated, Jackson Immuno Research 109-603-003, 1:200)  
 anti-rabbit secondary (donkey polyclonal, HRP-conjugated, Amersham NA934, 1:10,000)  
 anti-mouse secondary (sheep polyclonal, HRP-conjugated, Amersham NXA931, 1:10,000)

### Validation

Primary antibodies used for western blotting detected proteins with expected sizes confirming the specific binding to the target proteins. Primary antibodies used for IF recognized a signal that disappeared upon RNAi depletion.

-<https://www.abcam.com/products/primary-antibodies/hec1hec-antibody-9g3-ab3613.html>  
 -<https://www.mblbio.com/bio/g/dtl/A/?pcd=PD030>  
 -<https://www.thermofisher.com/antibody/product/A-21450.html?CID=AFLCA-A-21450>  
 -<https://www.thermofisher.com/antibody/product/Goat-anti-Mouse-IgG-H-L-Cross-Adsorbed-Secondary-Antibody-Polyclonal/A-11001>  
 -<https://www.jacksonimmuno.com/catalog/products/115-295-003>  
 -<https://www.fishersci.com/shop/products/donkey-anti-rabbit-igg-h-l-highly-cross-adsorbed-secondary-antibody-alex-fluor-488-invirogen/A21206>  
 -<https://www.jacksonimmuno.com/catalog/products/711-295-152>  
 -<https://www.jacksonimmuno.com/catalog/products/109-036-003>  
 -<https://www.cytivalifesciences.com/en/us/shop/protein-analysis/blotting-and-detection/blotting-standards-and-reagents/amersham-ecl-hrp-conjugated-antibodies-p-06260>  
 -<https://www.cytivalifesciences.com/en/us/shop/protein-analysis/blotting-and-detection/blotting-standards-and-reagents/amersham-ecl-hrp-conjugated-antibodies-p-06260>

## Eukaryotic cell lines

Policy information about [cell lines and Sex and Gender in Research](#)

### Cell line source(s)

-Sf9 cells (Gibco™Invitrogen Corporation, Cat. No. 11496-015)  
 -HeLa cells expressing mCherry-H2B were a gift of Sara Barozzi (Imaging Facility, IFOM-IEO Campus, Milan, Italy) and were not further authenticated.  
 -DLD1 Flp-In-T-REx also expressing osTIR1 used in this study were received from the laboratory of Don C. Cleveland and were not further authenticated

### Authentication

None of the cell lines used were authenticated. The original commercial source of the HeLa cell line is unknown

### Mycoplasma contamination

Cell lines were regularly tested for mycoplasma contamination and the test found to be negative

### Commonly misidentified lines (See [ICLAC](#) register)

We did not use any misidentified cell line

## Plants

---

Seed stocks

Not applicable

Novel plant genotypes

Not applicable

Authentication

Not applicable
