# Supplementary material for: Structure of the human KMN complex and implications for regulation of its assembly
Source: PubMed Central journal article supplement (PMC11189300; doi:10.1038/s41594-024-01230-9), 2024-03-08
Supplement: 41594_2024_1230_MOESM15_ESM.pdf [file 41594_2024_1230_MOESM15_ESM.pdf]

Extended Data Fig.10h

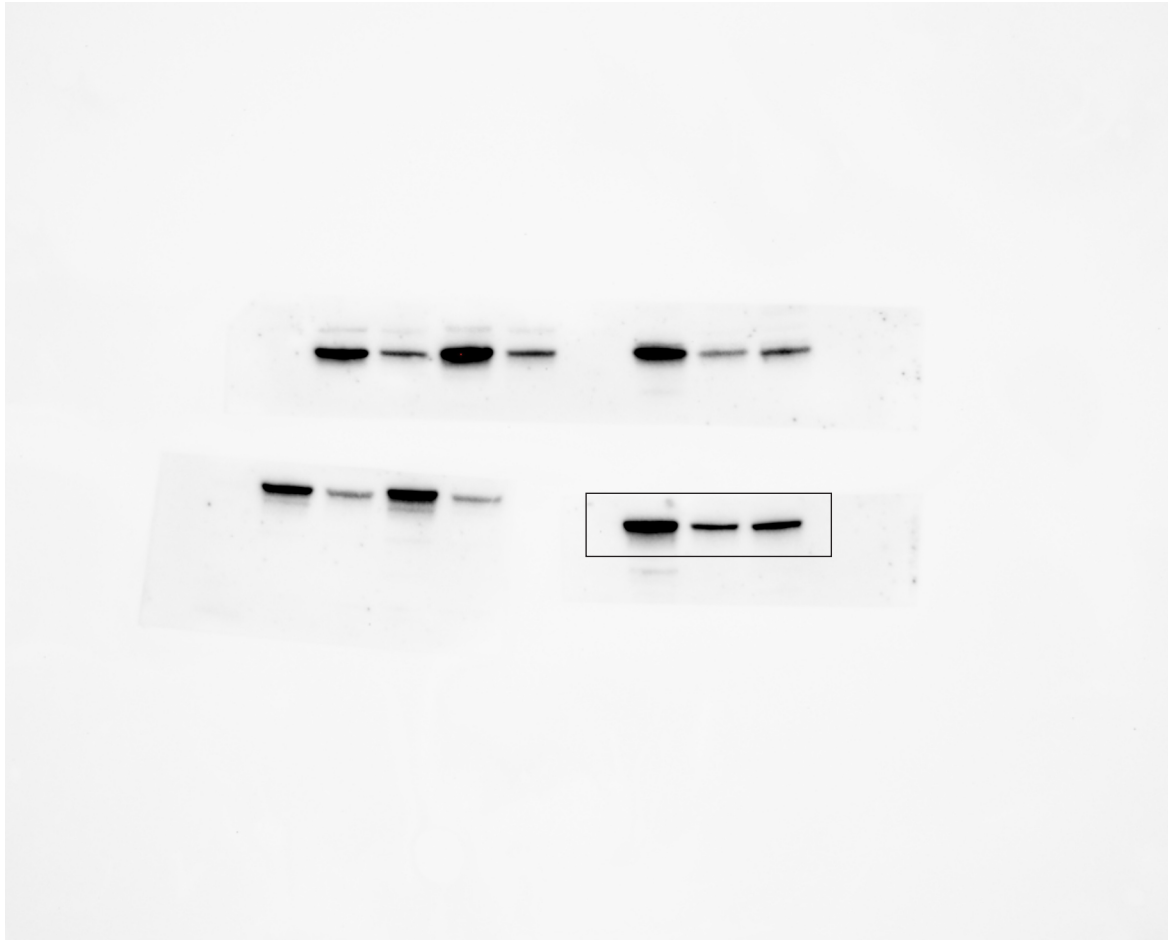

anti-GFP  
(1:1000)

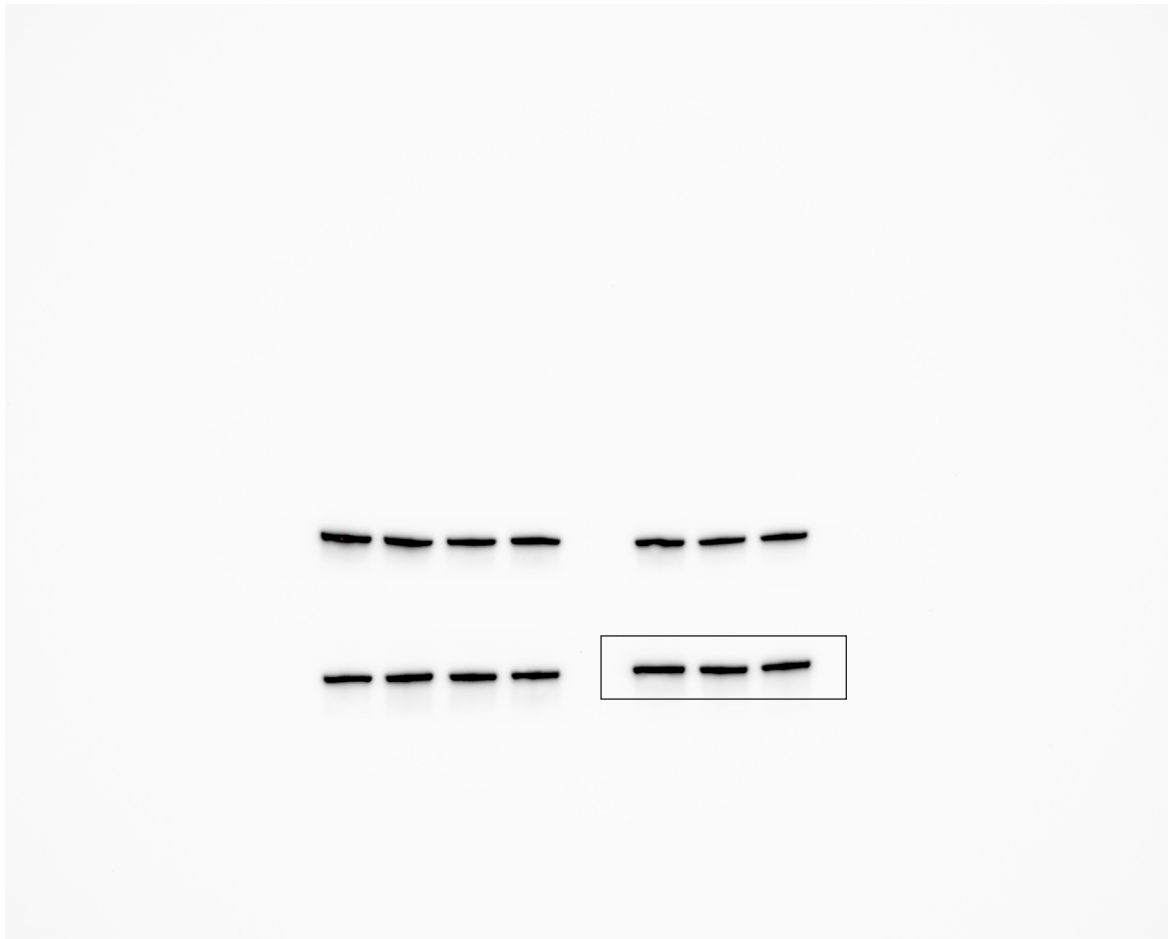

anti-vinculin  
(1:10000)

Extended Data Fig.10h (colorimetric)

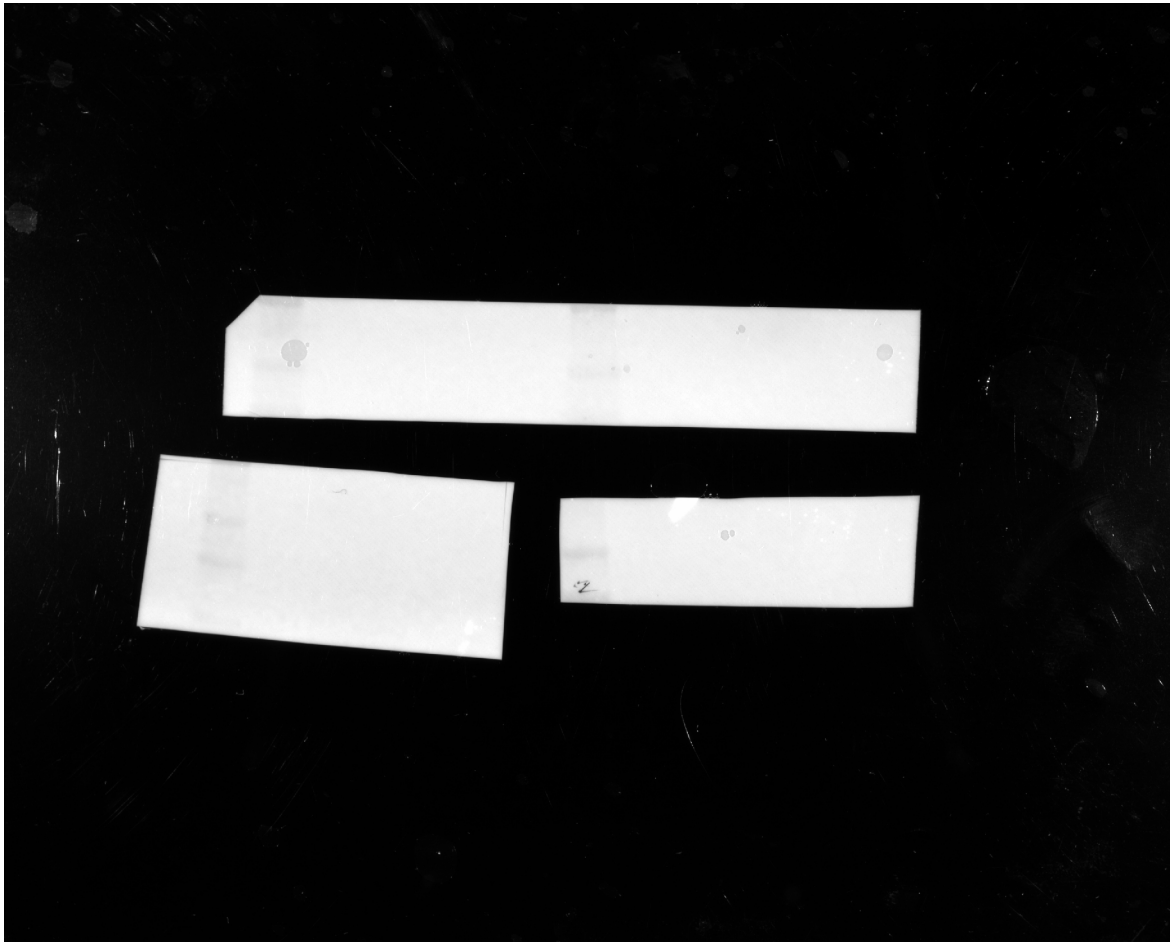

anti-GFP  
(1:1000)

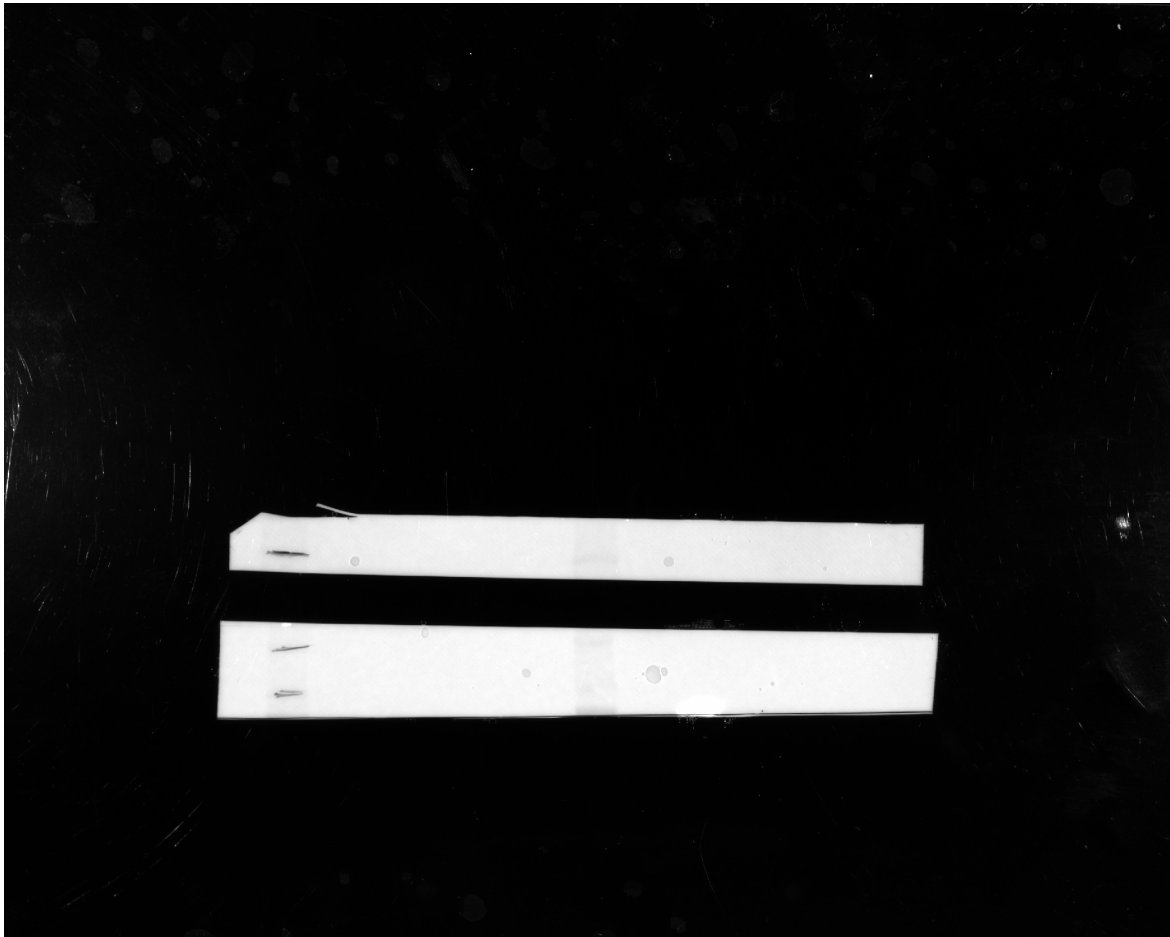

anti-vinculin  
(1:10000)

Extended Data Fig.10h (merge)

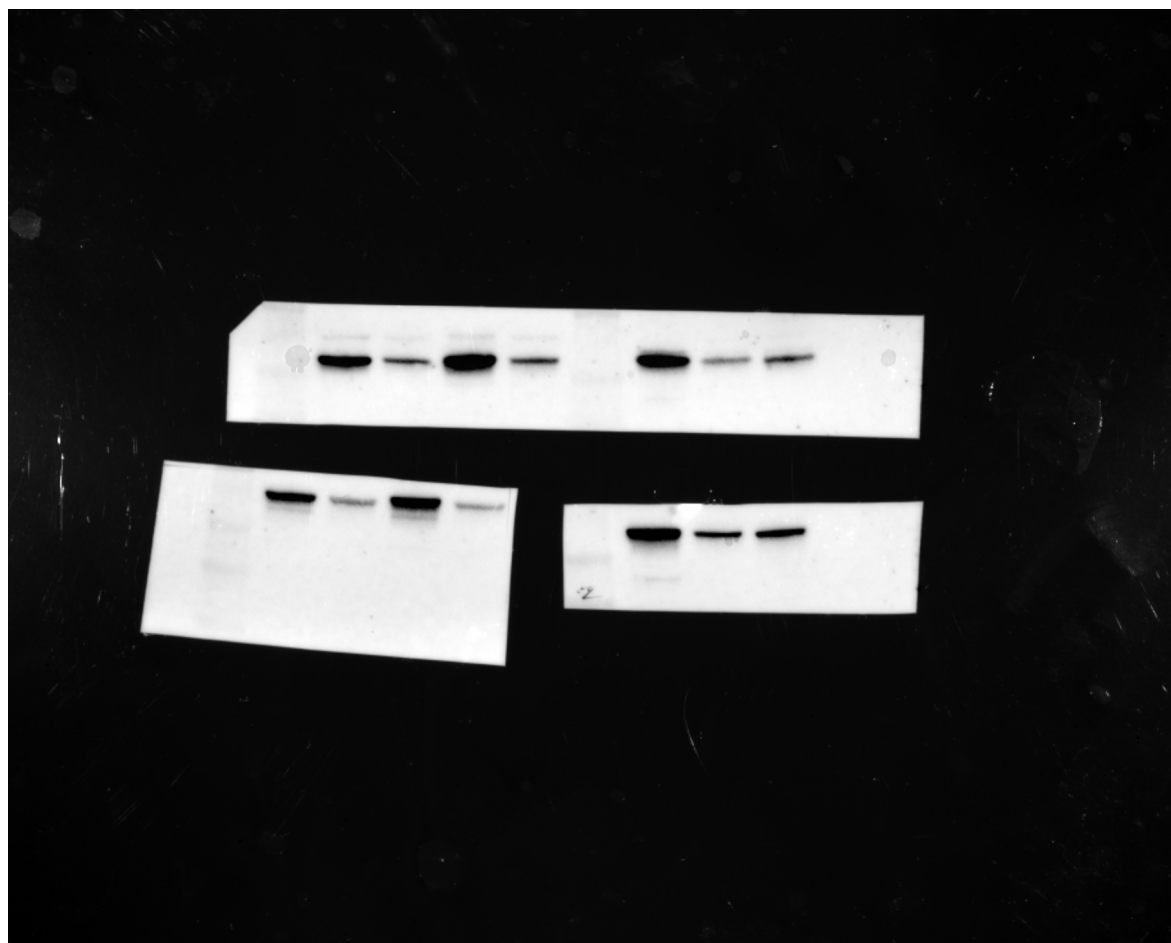

anti-GFP  
(1:1000)

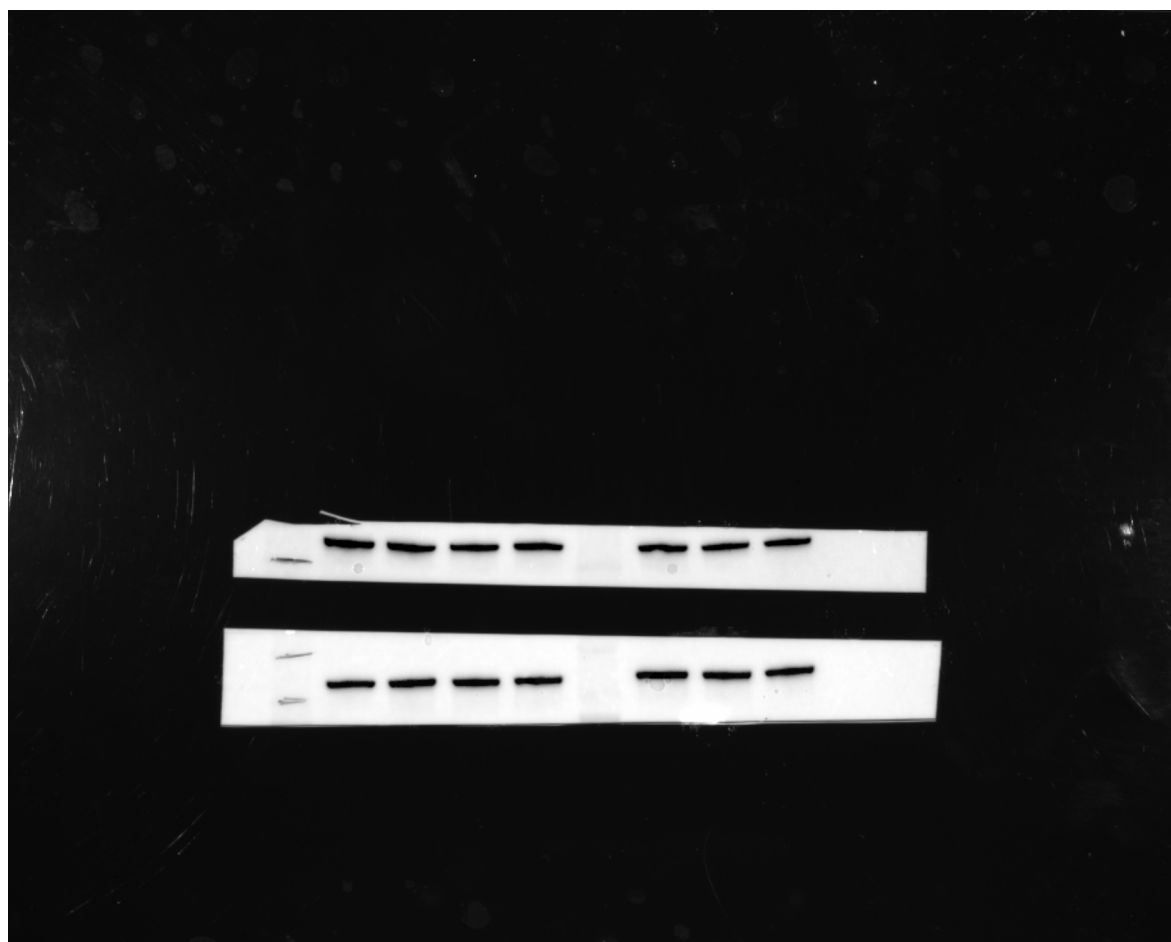

anti-vinculin  
(1:10000)
